# Supplementary material
Source: Royal Society of Chemistry journal article supplement (doi:10.1039/d6ta02632j)
Supplement: d6ta02632j1.pdf [file d6ta02632j1.pdf]

## Supporting Information

### **Magnetic-Field-Assisted Cascade Electrocatalysis: Simultaneous H<sub>2</sub>O<sub>2</sub> Generation and ·OH Radical Production for Coupled Hydrogen Evolution and Water Disinfection**

Yeonsu Han, †<sup>a</sup> Jungsue Choi, †<sup>a</sup> Soyun Oh, †<sup>a</sup> Hyun Ko, <sup>b</sup> and Hoyoung Lee <sup>a, b, c</sup>

<sup>a</sup> Department of Chemistry, Sungkyunkwan University (SKKU), Suwon, Republic of Korea.

<sup>b</sup> Institute for Quantum Biophysics (IQB), Sungkyunkwan University (SKKU), Suwon, Republic of Korea

<sup>c</sup> National Institute of Climate and Environment (NICE), Sungkyunkwan University, Suwon, Republic of Korea

† These authors contributed equally to this work.

E-mail: [hyoyoung@skku.edu](mailto:hyoyoung@skku.edu)

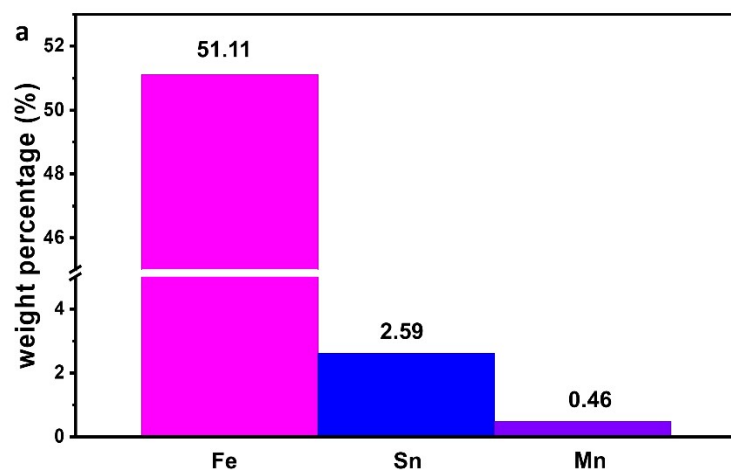

**Fig. S1** The atomic weight percentage of (a) MTOFO.

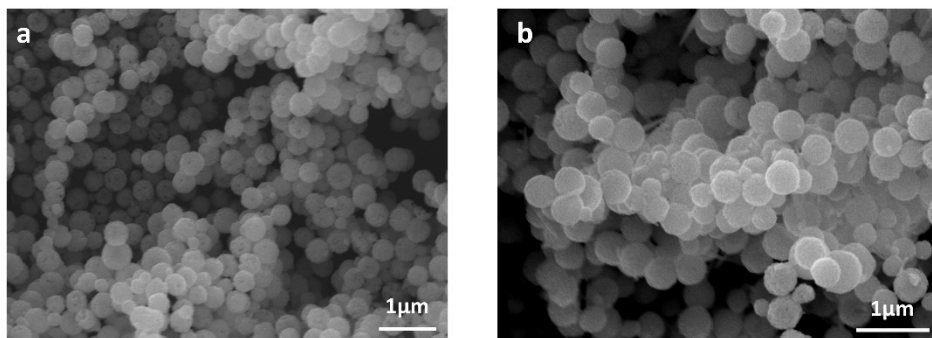

**Fig. S2** SEM images of (a) Fe<sub>3</sub>O<sub>4</sub> and (b) TOFO.

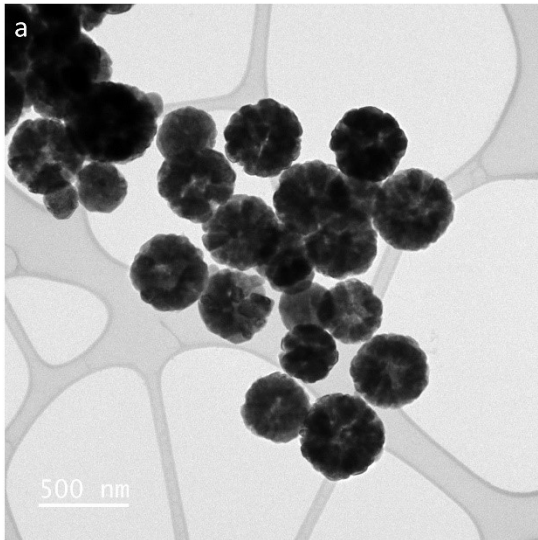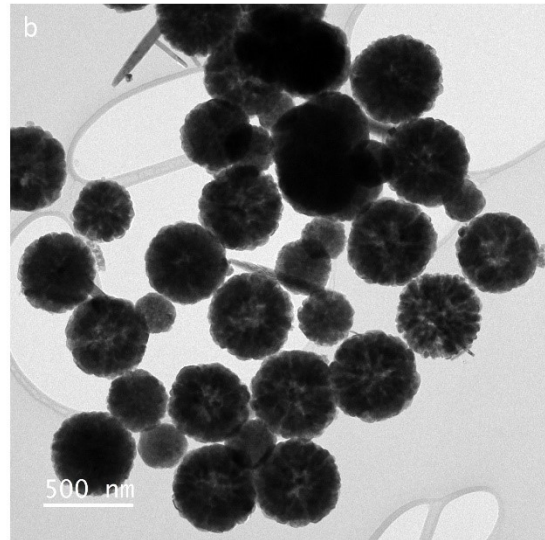

**Fig. S3** Low-magnification TEM images of (a) TOFO and (b) MTOFO.

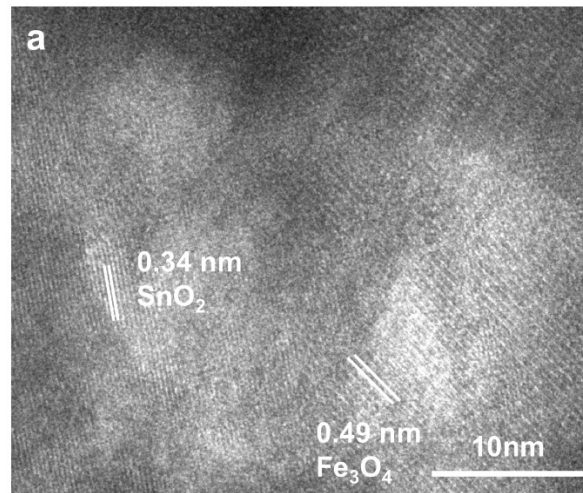

**Fig. S4 (a)** HR-TEM image of TOFO.

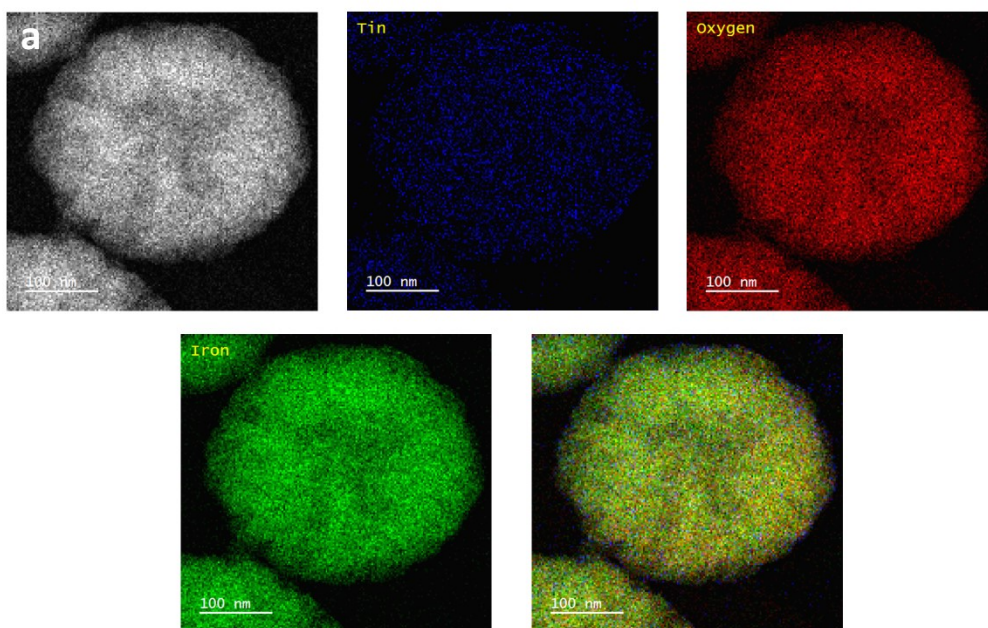

**Fig. S5** HAADF-STEM images of TOFO and EDS corresponding elemental and mixed mapping.

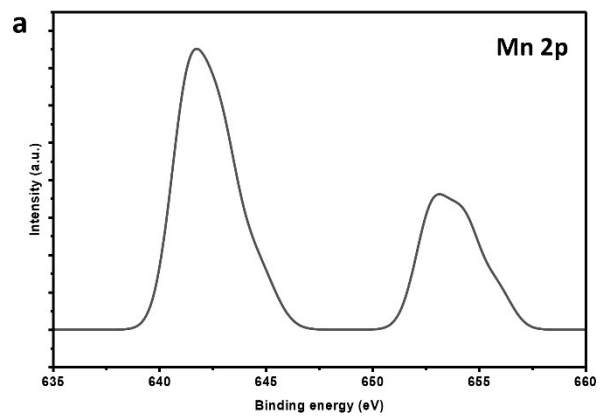

**Fig. S6 (a)** Mn 2p XPS of MTOFO.

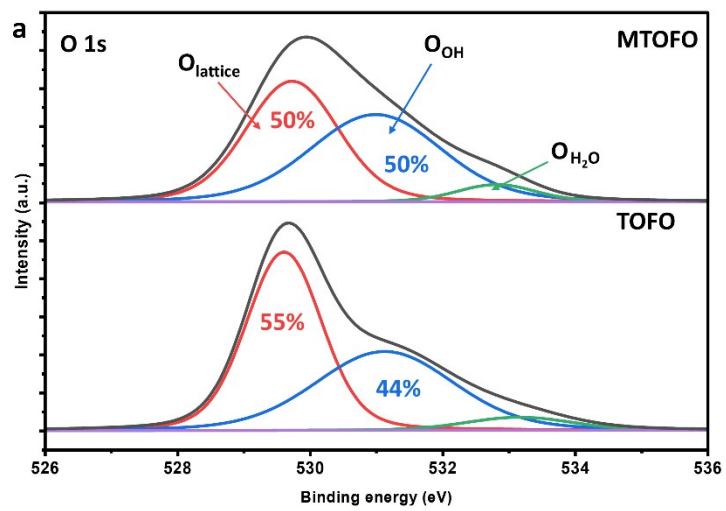

**Fig. S7** O 1s XPS of (a) MTOFO and (b) TOFO.

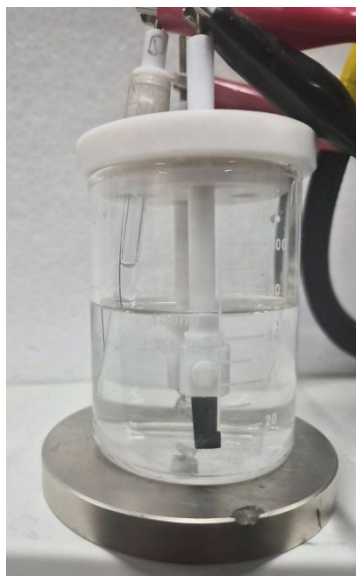

**Fig. S8** Electrochemical cell set up with magnet.

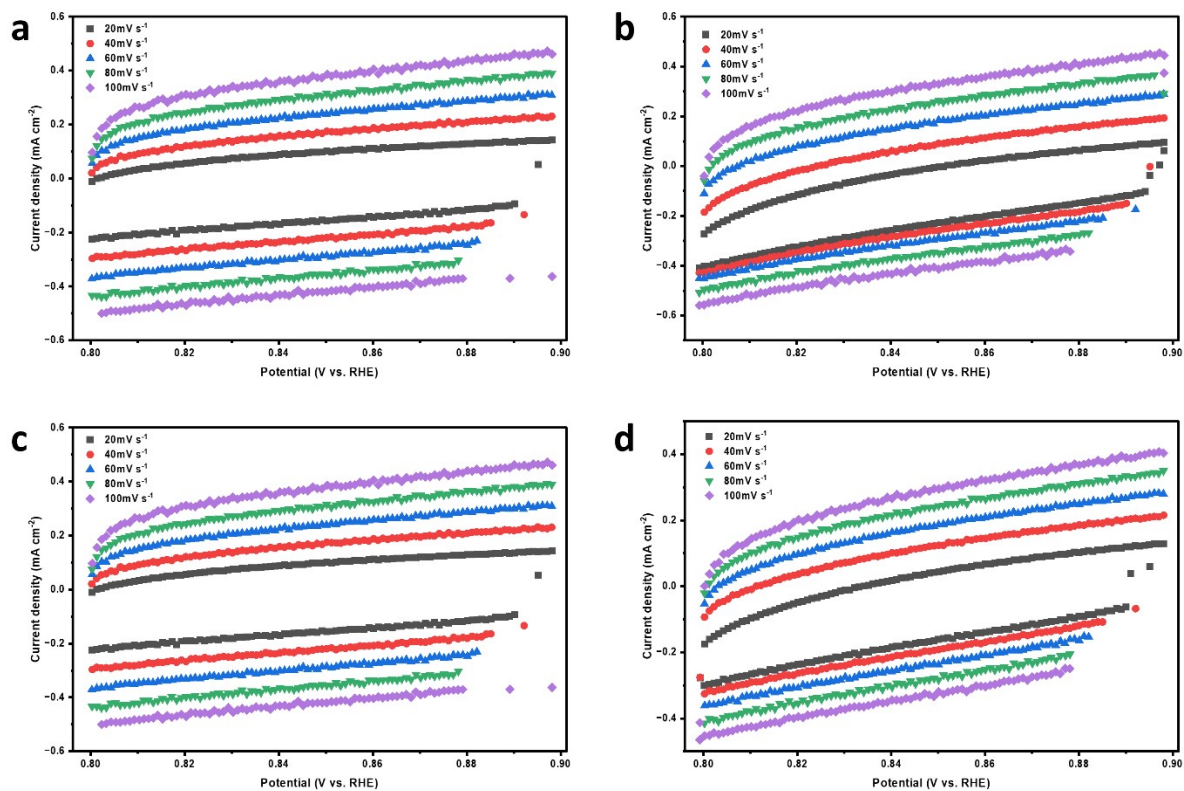

**Fig. S9** Various scan rate CV of (a) TOFO without magnet, (b) with magnet, (c) MTOFO without magnet, and (d) with magnet.

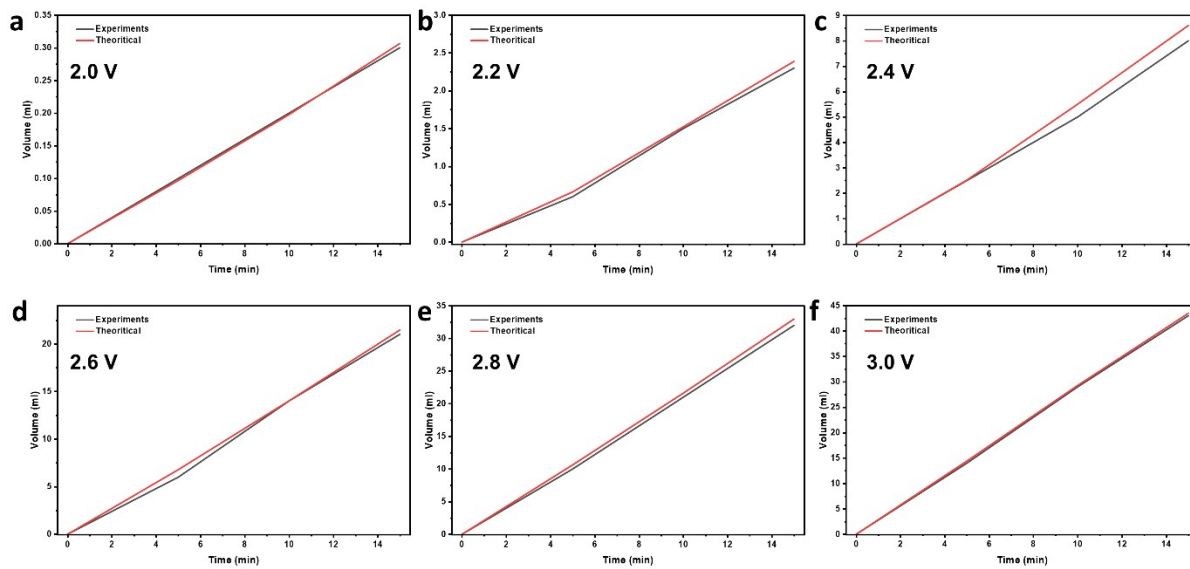

**Fig. S10** The amount of hydrogen production at each potential (a) - (f).

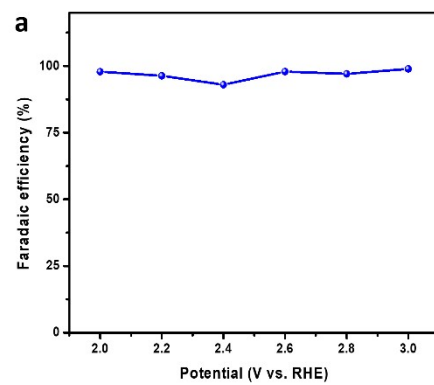

**Fig. S11** The faradaic efficiency of hydrogen at each potential.

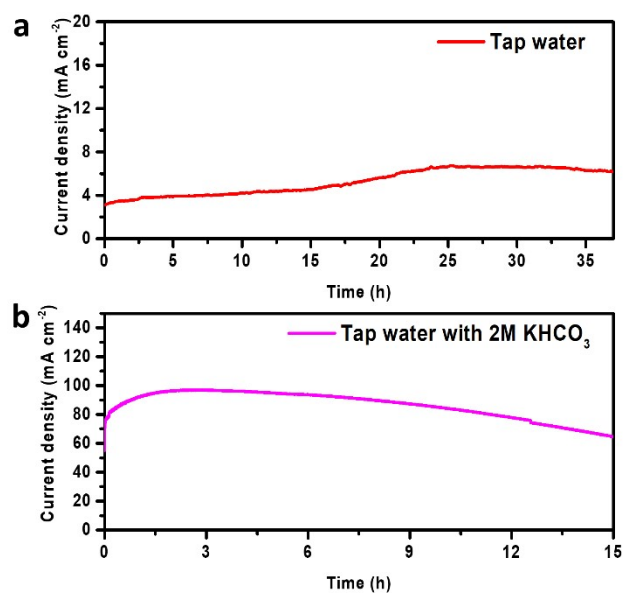

**Fig. S12** The Stability of MTOFO at 2.6 V vs. RHE in (a) tap water and (b) tap water with 2M KHCO<sub>3</sub>.

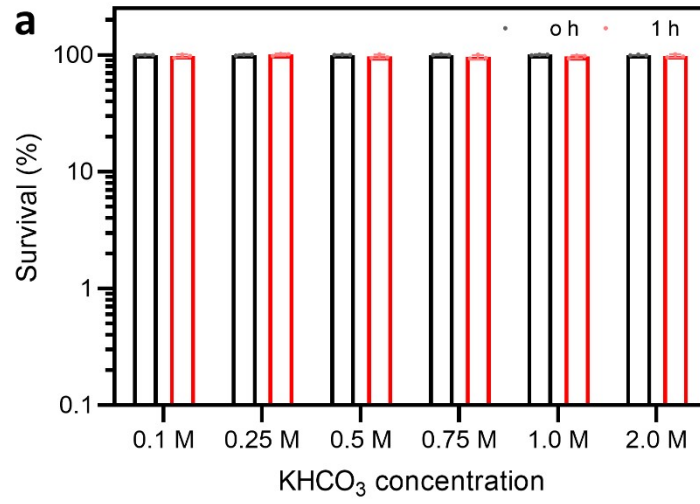

**Fig. S13** Viability of *E. coli* depending on KHCO<sub>3</sub> concentration ( $n = 3$  independent experiments per bacterial concentration).

**Table. S1** Comparison table of 2-electron WOR performance.

| <b>Electrodes<br/>(catalysts)</b>                     | <b>Solution</b>                    | <b>E vs. RHE</b> | <b>Production rate<br/><math>\mu\text{mol min}^{-1} \text{cm}^{-2}</math></b> | <b>Reference</b> |
|-------------------------------------------------------|------------------------------------|------------------|-------------------------------------------------------------------------------|------------------|
| <b>Mn-SnO<sub>2</sub>@Fe<sub>3</sub>O<sub>4</sub></b> | <b>2M KHCO<sub>3</sub></b>         | <b>2.6 V</b>     | <b>60.2</b>                                                                   | <b>This work</b> |
| BiVO <sub>4</sub>                                     | 1M NaHCO <sub>3</sub>              | 3.1 V            | 5.9                                                                           | [1]              |
| CaSnO <sub>3</sub>                                    | 2M KHCO <sub>3</sub>               | 3.2 V            | 4.7                                                                           | [2]              |
| Gd-BiVO <sub>4</sub>                                  | 2M KHCO <sub>3</sub>               | 3.2 V            | 10.6                                                                          | [3]              |
| PTFE/CPF                                              | 1M Na <sub>2</sub> CO <sub>3</sub> | 2.4 V            | 23.4                                                                          | [4]              |
| BDD                                                   | 2M KHCO <sub>3</sub>               | 3.5 V            | 19.7                                                                          | [5]              |
| Bi <sub>2</sub> WO <sub>6</sub> : Mo                  | 2M KHCO <sub>3</sub>               | 3.2 V            | 300                                                                           | [6]              |
| F <sub>0.4</sub> -WO <sub>3</sub>                     | 1M H <sub>2</sub> SO <sub>4</sub>  | 3.4 V            | 79.92                                                                         | [7]              |
| SnO <sub>2</sub>                                      | 1M NaHCO <sub>3</sub>              | 3.1 V            | 1.6                                                                           | [8]              |
| CuWO <sub>4</sub> /CC                                 | 2M KHCO <sub>3</sub>               | 3.0 V            | 11.8                                                                          | [9]              |
| TiO <sub>2</sub>                                      | 1M NaHCO <sub>3</sub>              | 3.3 V            | 1                                                                             | [10]             |
| MgSnO <sub>3</sub> @NF                                | 2M KHCO <sub>3</sub>               | 2.6 V            | 46.07                                                                         | [11]             |
| Mg <sub>1-x</sub> SnWO <sub>6-x</sub> 700             | 2M KHCO <sub>3</sub>               | 2.6 V            | 68.07                                                                         | [12]             |

**Table. S2** Comparison table of catalytic disinfection performance.

| Electrodes (catalysts)                                              | Solution                                              | Time                                              | Operate condition                                                                                      | Performance                                                                      | Referenc e       |
|---------------------------------------------------------------------|-------------------------------------------------------|---------------------------------------------------|--------------------------------------------------------------------------------------------------------|----------------------------------------------------------------------------------|------------------|
| <b>Mn-SnO<sub>2</sub>@Fe<sub>3</sub>O<sub>4</sub></b>               | <b>2M KHCO<sub>3</sub></b>                            | <b>60m</b>                                        | <b>2.6 V vs. RHE</b>                                                                                   | <b>99.9% at 2 × 10<sup>6</sup> CFU mL<sup>-1</sup> E. coli</b>                   | <b>This work</b> |
| Cathode: Reticulated vitreous carbon<br>Anode: Ti/RuO <sub>2</sub>  | 250mg L <sup>-1</sup> Na <sub>2</sub> SO <sub>4</sub> | 150 min                                           | 32 mA                                                                                                  | 99.99% at 10 <sup>6</sup> CFU mL <sup>-1</sup> E. coli                           | [13]             |
| Pt-coated titanium electrodes                                       | Tap water                                             | 45 min                                            | 6 V                                                                                                    | 99.999% at 2 × 10 <sup>2</sup> CFU mL <sup>-1</sup> Legionella                   | [14]             |
| Nitrogen-doped reduced graphene oxide                               | Tap water                                             | 15 min                                            | 5.8 mA cm <sup>-2</sup>                                                                                | 99.999% at 10 <sup>6</sup> CFU mL <sup>-1</sup> E. coli                          | [15]             |
| Co <sub>3</sub> O <sub>4</sub>                                      | 5mM NaCl                                              | 160 min                                           | 2.5 V                                                                                                  | 99.9999% at 5*10 <sup>6</sup> CFU mL <sup>-1</sup> E. coli                       | [16]             |
| CuO                                                                 | 9.0 g L <sup>-1</sup> sodium chloride                 | 960 min                                           | 6 V                                                                                                    | 99.9999% at 10 <sup>7</sup> CFU mL <sup>-1</sup> E. coli)                        | [17]             |
| Cu <sub>3</sub> P                                                   | DI water                                              | 720 min                                           | 1 V                                                                                                    | 99.9999% at 10 <sup>7</sup> CFU mL <sup>-1</sup> E. coli and S. aureus           | [18]             |
| Ag <sub>1</sub> /CN (Ag single atom/C <sub>3</sub> N <sub>4</sub> ) | DI water                                              | 240 min                                           | Xe lamp (<400nm, 300W)                                                                                 | 99.9% at 10 <sup>5</sup> CFU mL <sup>-1</sup> E. coli, S. aureus, MRSA and KREC  | [19]             |
| h <sup>3</sup> -FNCs (Fe single atom/NC)                            | DI water                                              | 240 min                                           | Oxidase-like Activity                                                                                  | >90% and 99% at 10 <sup>8</sup> CFU mL <sup>-1</sup> P. aeruginosa and S. aureus | [20]             |
| Cu Sazyme (Cu single-atom nanozyme)                                 |                                                       | 240 min (white ligh for 30 min and NIR for 10min) | Dual-light activation (808nm, 1.0W cm <sup>-2</sup> NIR + 400-700 nm 5mW cm <sup>-2</sup> White light) | 97% at 10 <sup>6</sup> CFU mL <sup>-1</sup> E. coli, MDRPA, S. aureus and MRSA   | [21]             |

## Reference

1. X. Shi, S. Siahrostami, G.-L. Li, Y. Zhang, P. Chakthranont, F. Studt, T. F. Jaramillo, X. Zheng and J. K. Nørskov, *Nature communications*, 2017, 8, 701.
2. S. Y. Park, H. Abroshan, X. Shi, H. S. Jung, S. Siahrostami and X. Zheng, *ACS Energy Letters*, 2018, 4, 352-357.
3. J. H. Baek, T. M. Gill, H. Abroshan, S. Park, X. Shi, J. Nørskov, H. S. Jung, S. Siahrostami and X. Zheng, *ACS Energy Letters*, 2019, 4, 720-728.
4. C. Xia, S. Back, S. Ringe, K. Jiang, F. Chen, X. Sun, S. Siahrostami, K. Chan and H. Wang, *Nature Catalysis*, 2020, 3, 125-134.
5. S. Mavrikis, M. Göltz, S. Rosiwal, L. Wang and C. Ponce de Leon, *ACS Applied Energy Materials*, 2020, 3, 3169-3173.
6. L. Li, Z. Hu and J. C. Yu, *Angewandte Chemie*, 2020, 132, 20719-20725.
7. Z. Chen, S. Geng, Y. Wang, Y. Wang and S. Song, *Applied Catalysis B: Environmental*, 2022, 317, 121756.
8. W. Guo, Y. Xie, S. Tang, B. Yu, X. Lian, G. Henkelman and X. Liu, *Applied Surface Science*, 2022, 596, 153634.
9. L. Li, K. Xiao, P. K. Wong, Z. Hu and J. C. Yu, *ACS applied materials & interfaces*, 2022, 14, 7878-7887.
10. D. Liu, D. Solanki, E. Stavitski, M. Li, S. Hu, V. S. Batista and K. R. Yang, *ACS Applied Energy Materials*, 2023, 6, 8368-8376.
11. C. B. Guta, C.-Y. Chang, F. T. Angerasa, B. D. Bejena, H. G. Edao, W. B. Dilebo, E. A. Moges, M.-C. Tsai, W.-N. Su and B. J. Hwang, *Chemical Engineering Journal*, 2025, 169336.
12. C. B. Guta, H. G. Edao, W. B. Dilebo, C.-Y. Chang, F. T. Angerasa, E. A. Moges, Y. Nikodimos, K. Lakshmanan, M.-C. Tsai and W.-N. Su, *Chemical Engineering Journal*, 2024, 500, 156418.
13. Y. Jin, Y. Shi, R. Chen, X. Chen, X. Zheng and Y. Liu, *Chemosphere*, 2019, 215, 380-387.
14. G. Cossali, E. Routledge, M. Ratcliffe, H. Blakes, J. Fielder and T. Karayiannis, *Journal of Environmental Engineering*, 2016, 142, 04016063.
15. G.-F. Norra, L. Baptista-Pires, E. C. Lumbaqué, C. M. Borrego and J. Radjenovic, *Chemical Engineering Journal*, 2022, 430, 132772.
16. S.-Y. Pi, M.-Y. Sun, Y.-F. Zhao, Y.-X. Chong, D. Chen and H. Liu, *Chemical Engineering Journal*, 2022, 435, 134967.
17. Z.-Y. Huo, X. Xie, T. Yu, Y. Lu, C. Feng and H.-Y. Hu, *Environmental science &*

- technology, 2016, 50, 7641-7649.
18. Z.-Y. Huo, J.-F. Zhou, Y. Wu, Y.-H. Wu, H. Liu, N. Liu, H.-Y. Hu and X. Xie, *Journal of Materials Chemistry A*, 2018, 6, 18813-18820.
  19. S. Rao, Z. Sun, Q. Liu, C. Cheng, C. Jin, J. Gao, B. Li, Y. Li, L. Liu and J. Yang, *ACS nano*, 2024, 18, 7074-7083.
  20. S. Chen, F. Huang, L. Mao, Z. Zhang, H. Lin, Q. Yan, X. Lu and J. Shi, *Nano-Micro Letters*, 2025, 17, 32.
  21. S. Xu, Y. Yuan, Y. Pan, H. Zhang, S. Yin, X. Zhang, Y. Zhang, S. Dai, H. Shen and Y. Li, *Small*, 2025, 21, 2502896.
